# Supplementary material
Source: HighWire-hosted journal article supplement (https://www.cmajopen.ca/highwire/filestream/88345/field_highwire_adjunct_files/0/open-2021-0063-1-at.pdf)
Supplement: open-2021-0063-1-at.pdf [file open-2021-0063-1-at.pdf]

### **Appendix 1: STANDARDIZED DATA ABSTRACTION FORM**

This form is presented just on the next page. This is a format imported directly from Redcap.

Confidential

Épidémiologie clinique de l'infection à *Borrelia burgdorferi* grave au Québec  
Page 1 of 216**Données socio-démographiques**

Record ID

Prénom et Nom

Date de naissance

(01-01-1901 si inconnue)

Sexe

- M  
 F

Numéro d'assurance maladie

(999 si donnée manquante)

Numéro de dossier médical

(999 si donnée manquante)

Ville de résidence

(999 si donnée manquante)

Établissement de la consultation initiale

- CHUS  
 Hôpital de Granby  
 Hôpital Brome-Missisquoi-Perkins  
 Hôpital de Lac-Mégantic  
 Hôpital de Magog  
 Hôpital d'Asbestos  
 Hôpital de Coaticook  
 Hôpital Pierre-Boucher  
 Hôpital Honoré-Mercier  
 Hôtel-Dieu de Sorel  
 Hôpital du Haut-Richelieu  
 Hôpital Charles-Le Moyne  
 Hôpital du Suroît  
 Hôpital Anna-Laberge  
 Hôpital Barrie-Memorial

Lieu probable d'acquisition de l'infection

- Estrie  
 Montérégie  
 Ailleurs au Québec  
 Ailleurs au Canada  
 Europe  
 Inconnu  
 USA (spécifier l'État \_\_\_\_\_)  
 (Cocher toutes les possibilités)

Si USA, spécifier l'État

(999 si donnée manquante)

Confidential

Épidémiologie clinique de l'infection à *Borrelia burgdorferi* grave au Québec  
Page 2 of 216**Antécédents \_ Comorbidités-Facteurs de risques**

| Comorbidités                          | Non                   | Oui                   |
|---------------------------------------|-----------------------|-----------------------|
| MCAS                                  | <input type="radio"/> | <input type="radio"/> |
| Insuffisance cardiaque                | <input type="radio"/> | <input type="radio"/> |
| Maladie vasculaire périphérique       | <input type="radio"/> | <input type="radio"/> |
| Maladie vasculaire cérébrale          | <input type="radio"/> | <input type="radio"/> |
| Démence                               | <input type="radio"/> | <input type="radio"/> |
| MPOC                                  | <input type="radio"/> | <input type="radio"/> |
| Ulcère peptique                       | <input type="radio"/> | <input type="radio"/> |
| Maladie hépatique légère              | <input type="radio"/> | <input type="radio"/> |
| Maladie hépatique modérée ou sévère   | <input type="radio"/> | <input type="radio"/> |
| Diabète sans atteinte périphérique    | <input type="radio"/> | <input type="radio"/> |
| Diabète avec atteinte périphérique    | <input type="radio"/> | <input type="radio"/> |
| Hémiplégie                            | <input type="radio"/> | <input type="radio"/> |
| Insuffisance rénale modérée ou sévère | <input type="radio"/> | <input type="radio"/> |
| Cancer (toute forme)                  | <input type="radio"/> | <input type="radio"/> |
| Cancer métastatique                   | <input type="radio"/> | <input type="radio"/> |
| Leucémie                              | <input type="radio"/> | <input type="radio"/> |
| Lymphome                              | <input type="radio"/> | <input type="radio"/> |
| Autre cancer hématologique            | <input type="radio"/> | <input type="radio"/> |
| Myelome                               | <input type="radio"/> | <input type="radio"/> |
| VIH                                   | <input type="radio"/> | <input type="radio"/> |
| SIDA                                  | <input type="radio"/> | <input type="radio"/> |
| Greffe                                | <input type="radio"/> | <input type="radio"/> |
| Transplantation de cellules souches   | <input type="radio"/> | <input type="radio"/> |
| Sclérose en plaques                   | <input type="radio"/> | <input type="radio"/> |
| Fibromyalgie                          | <input type="radio"/> | <input type="radio"/> |
| Maladie des tissus conjonctifs        | <input type="radio"/> | <input type="radio"/> |

Spécifier maladie des tissus conjonctifs

- Lupus (SLE)
- Polyarthrite rhumatoïde (PAR)
- Arthrite sporiasique (AP)
- Sclérodermie
- Syndrome de Sjögren
- Maladie des tissus conjonctif mixte ou non différenciée
- Polymyalgie rhumatica (PMR)
- Spondylite ankylosante

Confidential

Page 3 of 216

|                                                           |                                                                                                                                                                                                                                                                                                                                                                                                                                                          |
|-----------------------------------------------------------|----------------------------------------------------------------------------------------------------------------------------------------------------------------------------------------------------------------------------------------------------------------------------------------------------------------------------------------------------------------------------------------------------------------------------------------------------------|
| Maladie cutanée chronique                                 | <input type="radio"/> Non<br><input type="radio"/> Oui                                                                                                                                                                                                                                                                                                                                                                                                   |
| Spécifier maladie cutanée chronique                       | <input type="checkbox"/> Eczéma<br><input type="checkbox"/> Psoriasis<br><input type="checkbox"/> Urticaire                                                                                                                                                                                                                                                                                                                                              |
| Médication immunosuppressive                              | <input type="radio"/> Non<br><input type="radio"/> Oui                                                                                                                                                                                                                                                                                                                                                                                                   |
| Spécifier médication immunisuppressive                    | <input type="checkbox"/> Corticostéroïdes<br><input type="checkbox"/> Calcineurin inhibitors<br><input type="checkbox"/> Purine synthesis inhibitors<br><input type="checkbox"/> Target of rapamycin inhibitors<br><input type="checkbox"/> Depleting antibodies<br><input type="checkbox"/> Antineoplastic<br><input type="checkbox"/> Autre médication cytotoxique<br><input type="checkbox"/> Biologic agents<br><input type="checkbox"/> Non précisé |
| Spécifier biologic agent                                  | <input type="checkbox"/> Infliximab<br><input type="checkbox"/> Adalimumab<br><input type="checkbox"/> Etanercept<br><input type="checkbox"/> Epratuzumab<br><input type="checkbox"/> Aleccept<br><input type="checkbox"/> Afelizumab<br><input type="checkbox"/> Rituximab (dans les 6 derniers mois)<br><input type="checkbox"/> Other<br><input type="checkbox"/> Non précisé                                                                         |
| Antécédent de Maladie de Lyme                             | <input type="radio"/> Non<br><input type="radio"/> Oui                                                                                                                                                                                                                                                                                                                                                                                                   |
| Grossesse au moment du diagnostic de maladie de Lyme      | <input type="radio"/> Non<br><input type="radio"/> Oui                                                                                                                                                                                                                                                                                                                                                                                                   |
| Allaitement au moment du diagnostic de la Maladie de Lyme | <input type="radio"/> Non<br><input type="radio"/> Oui                                                                                                                                                                                                                                                                                                                                                                                                   |

Confidential

Épidémiologie clinique de l'infection à *Borrelia burgdorferi* grave au Québec  
Page 4 of 216**Visite initiale\_Diagnostic évoqué****CONSULTATION INITIALE**

Nombre de visites médicales avant qu'un diagnostic de Maladie de Lyme soit évoqué

---

  
(999 si donnée manquante)

Date de la première consultation pour des signes/symptômes reliés à la Maladie de Lyme (errance pré-diagnostic)

---

  
(01-01-1901 si inconnue)

Date du diagnostic évoqué de maladie de Lyme

---

  
(01-01-1901 si inconnue)

Nombre de visites médicales reliées au diagnostic de la Maladie de Lyme &lt; 3 mois du début du premier traitement d'antibiothérapie

---

  
(999 si donnée manquante)

Patient a reçu la prophylaxie post exposition?

 Non  
 Oui

Spécifier antibiotique reçu en PPE

 Doxycycline  
 Amoxicilline  
 Céfuroxime  
 Ceftriaxone  
 Penicilline G  
 Autre:

Dose PPE

---

  
(999 si donnée manquante)

Unité PPE

 mg  
 g  
 UI  
 Donnée manquante

Voie PPE

 PO  
 IV  
 IM  
 Donnée manquante

Fréquence PPE

 DIE  
 BID  
 TID  
 QID  
 Donnée manquante

Date de début PPE

---

  
(01-01-1901 si inconnue)

Confidential

Page 5 of 216

Date de fin PPE

(01-01-1901 si inconnue)

Patient référé par un médecin de famille

 Non  
 Oui

Patient référé par un autre CH

 Non  
 Oui

Type de prise en charge initiale

 Hospitalisation  
 Ambulatoire  
 Ambulatoire puis hospitalisation < 3 mois
**HOSPITALISATIONS**

Nombre d'hospitalisations reliées à cet épisode de maladie de Lyme

\_\_\_\_\_

**HOSPITALISATION # 1**

Date admission hospitalisation # 1

(01-01-1901 si inconnue)

Date congé hospitalisation # 1

(01-01-1901 si inconnue)

Admission aux SI ?

 Non  
 Oui

Nombre d'admission aux soins intensifs (SI)

\_\_\_\_\_

Date admission aux SI # 1 (HO # 1)

(01-01-1901 si inconnue)

Date congé des SI # 1 (HO # 1)

(01-01-1901 si inconnue)

Date admission aux SI # 2 (HO # 1)

(01-01-1901 si inconnue)

Date congé des SI # 2 (HO # 1)

(01-01-1901 si inconnue)

Date admission aux SI # 3 (HO # 1)

(01-01-1901 si inconnue)

Confidential

Page 6 of 216

Date congé des SI # 3 (HO # 1)

(01-01-1901 si inconnue)

**HOSPITALISATION # 2**

Date admission hospitalisation # 2

(01-01-1901 si inconnue)

Date congé hospitalisation # 2

(01-01-1901 si inconnue)

Admission aux SI ?

 Non  
 Oui

Nombre d'admission aux soins intensifs (SI)

\_\_\_\_\_

Date admission aux SI # 1 (HO # 2)

(01-01-1901 si inconnue)

Date congé des SI # 1 (HO # 2)

(01-01-1901 si inconnue)

Date admission SI # 2 (HO # 2)

(01-01-1901 si inconnue)

Date congé des SI # 2 (HO # 2)

(01-01-1901 si inconnue)

Date admission aux SI # 3 (HO # 2)

(01-01-1901 si inconnue)

Date congé des SI # 3 (HO # 2)

(01-01-1901 si inconnue)

**HOSPITALISATION # 3**

Date admission hospitalisation # 3

(01-01-1901 si inconnue)

Date congé hospitalisation # 3

(01-01-1901 si inconnue)

Admission aux SI ?

 Non  
 Oui

Confidential

Page 7 of 216

---

 Nombre d'admission aux soins intensifs (SI)
 

---



---

 Date admission aux SI # 1 (HO # 3)
 

---

(01-01-1901 si inconnue)

---

 Date congé des SI # 1 (HO # 3)
 

---

(01-01-1901 si inconnue)

---

 Date admission SI # 2 (HO # 3)
 

---

(01-01-1901 si inconnue)

---

 Date congé des SI # 2 (HO # 3)
 

---

(01-01-1901 si inconnue)

---

 Date admission aux SI # 3 (HO # 3)
 

---

(01-01-1901 si inconnue)

---

 Date congé des SI # 3 (HO # 3)
 

---

(01-01-1901 si inconnue)

### ATTEINTES CUTANÉES

Morsure de tique observée par le patient?

- Non  
 Oui

---

 Date de la morsure de tique
 

---

(01-01-1901 si inconnue)

---

 Durée d'insertion de la tique
 

---

- < 24h  
 >24h  
 Inconnue

### ERYTHÈME MIGRANT

Érythème migrant ( $\geq 5$  cm) observé par médecin?

- Non  
 Oui

---

 Est-ce que le nombre d'EM est précisé dans la note médicale?
 

---

- Non  
 Oui

---

 Nombre d'érythèmes migrants ( $\geq 5$  cm) décrits
 

---



---

 Date début de l'érythème migrant ( $\geq 5$  cm) # 1
 

---

(01-01-1901 si inconnue)



Confidential

Page 8 of 216

Site de l'érythème migrant ( $\geq 5$  cm) # 1

- Tête et cou
- Membres supérieures
- Thorax antérieur
- Thorax postérieur
- Abdomen
- Région lombaire
- Zone pelviennes (aines, fesse, organes génitaux externes)
- Membres inférieurs
- Non précisé

Date début de l'érythème migrant ( $\geq 5$  cm) # 2

(01-01-1901 si inconnue)

Site de l'érythème migrant ( $\geq 5$  cm) # 2

- Tête et cou
- Membres supérieures
- Thorax antérieur
- Thorax postérieur
- Abdomen
- Région lombaire
- Zone pelviennes (aines, fesse, organes génitaux externes)
- Membres inférieurs
- Non précisé

Date début de l'érythème migrant ( $\geq 5$  cm) # 3

(01-01-1901 si inconnue)

Site de l'érythème migrant ( $\geq 5$  cm) # 3

- Tête et cou
- Membres supérieures
- Thorax antérieur
- Thorax postérieur
- Abdomen
- Région lombaire
- Zone pelviennes (aines, fesse, organes génitaux externes)
- Membres inférieurs
- Non précisé

Date début de l'érythème migrant ( $\geq 5$  cm) # 4

(01-01-1901 si inconnue)

Site de l'érythème migrant ( $\geq 5$  cm) # 4

- Tête et cou
- Membres supérieures
- Thorax antérieur
- Thorax postérieur
- Abdomen
- Région lombaire
- Zone pelviennes (aines, fesse, organes génitaux externes)
- Membres inférieurs
- Non précisé

Date début de l'érythème migrant ( $\geq 5$  cm) # 5

(01-01-1901 si inconnue)

Confidential

Page 9 of 216

---

Site de l'érythème migrant ( $\geq 5$  cm) # 5

- Tête et cou
- Membres supérieures
- Thorax antérieur
- Thorax postérieur
- Abdomen
- Région lombaire
- Zone pelviennes (aines, fesse, organes génitaux externes)
- Membres inférieurs
- Non précisé

---

Date début de l'érythème migrant ( $\geq 5$  cm) # 6

---

(01-01-1901 si inconnue)

---

Site de l'érythème migrant ( $\geq 5$  cm) # 6

- Tête et cou
  - Membres supérieures
  - Thorax antérieur
  - Thorax postérieur
  - Abdomen
  - Région lombaire
  - Zone pelviennes (aines, fesse, organes génitaux externes)
  - Membres inférieurs
  - Non précisé
- 

Date début de l'érythème migrant ( $\geq 5$  cm) # 7

---

(01-01-1901 si inconnue)

---

Site de l'érythème migrant ( $\geq 5$  cm) # 7

- Tête et cou
  - Membres supérieures
  - Thorax antérieur
  - Thorax postérieur
  - Abdomen
  - Région lombaire
  - Zone pelviennes (aines, fesse, organes génitaux externes)
  - Membres inférieurs
  - Non précisé
- 

Date début de l'érythème migrant ( $\geq 5$  cm) # 8

---

(01-01-1901 si inconnue)

---

Site de l'érythème migrant ( $\geq 5$  cm) # 8

- Tête et cou
- Membres supérieures
- Thorax antérieur
- Thorax postérieur
- Abdomen
- Région lombaire
- Zone pelviennes (aines, fesse, organes génitaux externes)
- Membres inférieurs
- Non précisé

Confidential

Page 10 of 216

**LÉSIONS CUTANÉES SUPPLÉMENTAIRES**

Lésions supplémentaires (&lt; 5cm) observées par le médecin?

- Non  
 Oui

Est-ce que le nombre de lésions supplémentaires est précisé dans la note médicale?

- Non  
 Oui

Nombre de lésions supplémentaires décrites

\_\_\_\_\_

Date de début\_Lésion supplémentaire # 1

\_\_\_\_\_  
(01-01-1901 si inconnue)

Site lésion supplémentaire # 1

- Tête et cou  
 Membres supérieures  
 Thorax antérieur  
 Thorax postérieur  
 Abdomen  
 Région lombaire  
 Zone pelviennes (aines, fesse, organes génitaux externes)  
 Membres inférieurs  
 Non précisé

Diamètre (cm) de la lésion # 1

\_\_\_\_\_  
(999 si donnée manquante)

Date de début\_Lésion supplémentaire # 2

\_\_\_\_\_  
(01-01-1901 si inconnue)

Site lésion supplémentaire # 2

- Tête et cou  
 Membres supérieures  
 Thorax antérieur  
 Thorax postérieur  
 Abdomen  
 Région lombaire  
 Zone pelviennes (aines, fesse, organes génitaux externes)  
 Membres inférieurs  
 Non précisé

Diamètre (cm) de la lésion # 2

\_\_\_\_\_  
(999 si donnée manquante)

Date de début\_Lésion supplémentaire # 3

\_\_\_\_\_  
(01-01-1901 si inconnue)

Confidential

Page 11 of 216

Site lésion supplémentaire # 3

- Tête et cou
- Membres supérieures
- Thorax antérieur
- Thorax postérieur
- Abdomen
- Région lombaire
- Zone pelviennes (aines, fesse, organes génitaux externes)
- Membres inférieurs
- Non précisé

Diamètre (cm) de la lésion # 3

---

  
(999 si donnée manquante)

Date de début\_Lésion supplémentaire # 4

---

  
(01-01-1901 si inconnue)

Site lésion supplémentaire # 4

- Tête et cou
- Membres supérieures
- Thorax antérieur
- Thorax postérieur
- Abdomen
- Région lombaire
- Zone pelviennes (aines, fesse, organes génitaux externes)
- Membres inférieurs
- Non précisé

Diamètre (cm) de la lésion # 4

---

  
(999 si donnée manquante)

Date de début\_Lésion supplémentaire # 5

---

  
(01-01-1901 si inconnue)

Site lésion supplémentaire # 5

- Tête et cou
- Membres supérieures
- Thorax antérieur
- Thorax postérieur
- Abdomen
- Région lombaire
- Zone pelviennes (aines, fesse, organes génitaux externes)
- Membres inférieurs
- Non précisé

Diamètre (cm) de la lésion # 5

---

  
(999 si donnée manquante)

Confidential

Page 12 of 216

**MANIFESTATIONS CUTANÉES TERTIAIRES**

Manifestations cutanées tertiaires ?  Non  
 Oui

Spécifier manifestations cutanées tertiaires \_\_\_\_\_

Date de début des manifestations cutanées tertiaires \_\_\_\_\_

(01-01-1901 si inconnue)

**MANIFESTATIONS GÉNÉRALES**

|                                  | Non                   | Oui                   |
|----------------------------------|-----------------------|-----------------------|
| Céphalée                         | <input type="radio"/> | <input type="radio"/> |
| Arthralgie (douleur articulaire) | <input type="radio"/> | <input type="radio"/> |
| Myalgie (douleur musculaire)     | <input type="radio"/> | <input type="radio"/> |
| Fatigue                          | <input type="radio"/> | <input type="radio"/> |
| Insomnie/trouble du sommeil      | <input type="radio"/> | <input type="radio"/> |
| Température                      | <input type="radio"/> | <input type="radio"/> |

Température maximale objectivée par le patient \_\_\_\_\_

(99.9 si donnée manquante)

Température documentée au moment de la visite initiale \_\_\_\_\_

(99.9 si donnée manquante)

Date de début des premières manifestations générales \_\_\_\_\_

(01-01-1901 si inconnue)

**SYMPTÔMES CARDIAQUES**

|                      | Non                   | Oui                   |
|----------------------|-----------------------|-----------------------|
| Syncope              | <input type="radio"/> | <input type="radio"/> |
| Palpitations         | <input type="radio"/> | <input type="radio"/> |
| Douleurs thoraciques | <input type="radio"/> | <input type="radio"/> |
| Dyspnée              | <input type="radio"/> | <input type="radio"/> |

Date de début des premiers symptômes cardiaques \_\_\_\_\_

(01-01-1901 si inconnue)

Confidential

Page 13 of 216

**ATTEINTES CARDIAQUES OBJECTIVÉES**

|                                      | Non                   | Oui                   |
|--------------------------------------|-----------------------|-----------------------|
| Myocardite                           | <input type="radio"/> | <input type="radio"/> |
| Péricardite                          | <input type="radio"/> | <input type="radio"/> |
| Bloc auriculoventriculaire (Bloc AV) | <input type="radio"/> | <input type="radio"/> |

Type de bloc AV

1e degré (pr > 0.2 sec.)  
 2e degré (Mobitz I ou Mobitz II)  
 3e degré (bloc AV complet)  
 Pas précisé

Date du début des atteintes cardiaques objectivées

\_\_\_\_\_

(01-01-1901 si inconnue)

**MUSCULO-SQUELETTIQUE**

**N.B. Si douleur articulaire SANS gonflement ou NON migratrice cochez "Arthralgie" à la section "MANIFESTATIONS GÉNÉRALES"**

Douleur articulaire migratrice

Non  
 Oui

Douleur articulaire avec gonflement

Non  
 Oui

Site du gonflement articulaire

Épaule  
 Coude  
 Poignet  
 Main  
 Genou  
 Cheville  
 Pied  
 Mâchoire

Date de début des manifestations musculo-squelettiques

\_\_\_\_\_

(01-01-1901 si inconnue)

**PONCTION ARTICULAIRE**

Ponction articulaire réalisée ?

Non  
 Oui

Nombre de ponctions articulaires

\_\_\_\_\_

Date de la ponction articulaire # 1

\_\_\_\_\_

(01-01-1901 si inconnue)

Confidential

Page 14 of 216

Nombre de leucocytes

---

  
(999 si donnée manquante)

Date de la ponction articulaire # 2

---

  
(01-01-1901 si inconnue)

Nombre de leucocytes

---

  
(999 si donnée manquante)**DÉBRIDEMENT EN SALLE D'OPÉRATION (SOP)**

Débridement en SOP ?

 Non  
 Oui

Nombre de débridements en salle d'opération

---

Date du débridement en SOP # 1

---

  
(01-01-1901 si inconnue)

Date du débridement en SOP # 2

---

  
(01-01-1901 si inconnue)**SYMPTÔMES NEUROLOGIQUES**

|                              | Non                   | Oui                   |
|------------------------------|-----------------------|-----------------------|
| Difficultés de concentration | <input type="radio"/> | <input type="radio"/> |
| Troubles de la mémoire       | <input type="radio"/> | <input type="radio"/> |
| Tremblements                 | <input type="radio"/> | <input type="radio"/> |
| Paresthésies                 | <input type="radio"/> | <input type="radio"/> |
| Raideur de la nuque          | <input type="radio"/> | <input type="radio"/> |
| Paralysie faciale            | <input type="radio"/> | <input type="radio"/> |

Date de début des symptômes neurologiques

---

  
(01-01-1901 si inconnue)**MANIFESTATIONS NEUROLOGIQUES OBJECTIVÉES**

|                             | Non                   | Oui                   |
|-----------------------------|-----------------------|-----------------------|
| Encéphalite                 | <input type="radio"/> | <input type="radio"/> |
| Méningite                   | <input type="radio"/> | <input type="radio"/> |
| Radiculopathie              | <input type="radio"/> | <input type="radio"/> |
| Atteinte des nerfs crâniens | <input type="radio"/> | <input type="radio"/> |

Confidential

Page 15 of 216

Spécifier nerfs crâniens atteints

- I  
 II  
 III  
 IV  
 V  
 VI  
 VII  
 VIII  
 IX  
 X  
 XI  
 XII  
 Non spécifié

Date de début des manifestations neurologiques  
objectivées

\_\_\_\_\_

(01-01-1901 si inconnue)

**PONCTION LOMBAIRE**

Ponction lombaire réalisée ?

- Non  
 Oui

Nombre de ponctions lombaires

\_\_\_\_\_

**PONCTION LOMBAIRE # 1**

Date de la ponction lombaire # 1

\_\_\_\_\_

(01-01-1901 si inconnue)

Nombre de leucocytes

\_\_\_\_\_

(999 si donnée manquante)

Nombre de globules rouges

\_\_\_\_\_

(999 si donnée manquante)

% de neutrophiles

\_\_\_\_\_

(999 si donnée manquante)

% de lymphocytes

\_\_\_\_\_

(999 si donnée manquante)

Protéïnorachie

\_\_\_\_\_

(999 si donnée manquante)

Glycorachie

\_\_\_\_\_

(999 si donnée manquante)



Confidential

Page 16 of 216

**PONCTION LOMBAIRE # 2**

Date de la ponction lombaire # 2

---

  
(01-01-1901 si inconnue)

Nombre de leucocytes

---

  
(999 si donnée manquante)

Nombre de globules rouges

---

  
(999 si donnée manquante)

% de neutrophiles

---

  
(999 si donnée manquante)

% de lymphocytes

---

  
(999 si donnée manquante)

Protéïnorachie

---

  
(999 si donnée manquante)

Glycorachie

---

  
(999 si donnée manquante)**RÉSONANCE MAGNÉTIQUE (IRM)**

Résonance magnétique réalisée (IRM) ?

- Non  
 Oui

Nombre d'IRM

---

**IRM # 1**

Date IRM # 1

---

  
(01-01-1901 si inconnue)

Localisation de l'IRM # 1

- Cerveau  
 Colonne vertébrale  
 Articulation

Résultat IRM # 1

- Normal  
 Anormal  
 Donnée manquante

Spécifier résultat anormal

---

Confidential

Page 17 of 216

**IRM # 2**

Date IRM # 2

---

  
(01-01-1901 si inconnue)

Localisation de l'IRM # 2

- Cerveau  
 Colonne vertébrale  
 Articulation

Résultat IRM # 2

- Normal  
 Anormal  
 Donnée manquante

Spécifier résultat anormal

---

**MANIFESTATIONS OCULAIRES OBJECTIVÉES**

|               | Non                   | Oui                   |
|---------------|-----------------------|-----------------------|
| Conjonctivite | <input type="radio"/> | <input type="radio"/> |
| Uvéite        | <input type="radio"/> | <input type="radio"/> |
| Kératite      | <input type="radio"/> | <input type="radio"/> |

Spécifier type de kératite

- Infectieuse  
 D'exposition  
 Pas précisé

Date de début des manifestations oculaires  
objectivées

---

  
(01-01-1901 si inconnue)**ANTIBIOTHÉRAPIE****Antibiotiques prescrits au moment du diagnostic évoqué de maladie de Lyme**

Antibiothérapie administrée

- Non  
 Oui

Observance du traitement par le patient

- Non  
 Oui

Nombre d'antibiotiques administrés

---

Confidential

Page 18 of 216

**ANTIBIOTIQUE # 1**

Nom antibiotique # 1

- Doxycycline
- Amoxicilline
- Céfuroxime
- Ceftriaxone
- Penicilline G
- Clarithromycin
- Cephalexine
- Clavulin
- Clindamycine
- Azithromycine
- Tazobactam
- Vancomycine
- Céfazoline
- Céfadroxil

Dose antibiotique # 1

\_\_\_\_\_  
(999 si donnée manquante)

Unité antibiotique # 1

- mg
- g
- UI
- Donnée manquante

Voie antibiotique # 1

- PO
- IV
- IM
- Donnée manquante

Fréquence antibiotique # 1

- DIE
- BID
- TID
- QID
- Donnée manquante

Nombre de jours de traitement prescrit\_atb # 1

\_\_\_\_\_  
(Noter en jours)

Date début de l'antibiotique # 1

\_\_\_\_\_  
(01-01-1901 si inconnue)

Date fin de l'antibiotique # 1

\_\_\_\_\_  
(01-01-1901 si inconnue)

Confidential

Page 19 of 216

**ANTIBIOTIQUE # 2**

Nom antibiotique # 2

- Doxycycline
- Amoxicilline
- Céfuroxime
- Ceftriaxone
- Penicilline G
- Clarithromycin
- Cephalaxine
- Clavulin
- Clindamycine
- Azithromycine
- Tazobactam
- Vancomycine
- Céfazoline
- Céfadroxil

Dose antibiotique # 2

\_\_\_\_\_  
(999 si donnée manquante)

Unité antibiotique # 2

- mg
- g
- UI
- Donnée manquante

Voie antibiotique # 2

- PO
- IV
- IM
- Donnée manquante

Fréquence antibiotique # 2

- DIE
- BID
- TID
- QID
- Donnée manquante

Nombre de jours de traitement prescrit\_atb # 2

\_\_\_\_\_  
(Noter en jours)

Date début de l'antibiotique # 2

\_\_\_\_\_  
(01-01-1901 si inconnue)

Date fin de l'antibiotique # 2

\_\_\_\_\_  
(01-01-1901 si inconnue)

Confidential

Page 20 of 216

**RÉFÉRENCES EN SPÉCIALITÉ**

Patient référé en spécialité  Non  
 Oui

Type de spécialité

- Infectiologie-microbiologie
- Cardiologie
- Neurologie
- Rhumatologie
- Ophtalmologie
- Orthopédie
- Dermatologie
- Médecine interne
- Neurochirurgie
- Pédiatrie
- Chirurgie vasculaire
- ORL
- Oncologie
- Allergologie

(Cocher toutes les possibilités)

**MODIFICATION DE L'ANTIBIOTHÉRAPIE DANS LES 3 MOIS SUIVANT LE DÉBUT DU PREMIER ANTIBIOTIQUE PRESCRIT**

Modification de l'antibiothérapie < 3 mois suivant le début du premier antibiotique prescrit  Non  
 Oui

Nombre de modifications < 3 mois suivant le début du premier antibiotique prescrit \_\_\_\_\_

**MODIFICATION # 1**

Raison de la modification # 1

- Échec au traitement
- Traitement initial non optimal
- Modification de la voie d'administration
- Modification de la durée du traitement
- Réaction allergique
- Non précisé

Nom

- Doxycycline
- Amoxicilline
- Céfuroxime
- Ceftriaxone
- Penicilline G
- Clarithromycin
- Cephalexine
- Clavulin
- Clindamycine
- Azithromycine
- Tazobactam
- Vancomycine
- Céfazoline
- Céfadroxil

Dose \_\_\_\_\_  
 (999 si donnée manquante)

Confidential

Page 21 of 216

|                                                         |                                                                                                                                                                                                                                                                                                                                                                                                                                                                                                                                      |
|---------------------------------------------------------|--------------------------------------------------------------------------------------------------------------------------------------------------------------------------------------------------------------------------------------------------------------------------------------------------------------------------------------------------------------------------------------------------------------------------------------------------------------------------------------------------------------------------------------|
| Unité                                                   | <input type="radio"/> mg<br><input type="radio"/> g<br><input type="radio"/> UI<br><input type="radio"/> Donnée manquante                                                                                                                                                                                                                                                                                                                                                                                                            |
| Voie                                                    | <input type="radio"/> PO<br><input type="radio"/> IV<br><input type="radio"/> IM<br><input type="radio"/> Donnée manquante                                                                                                                                                                                                                                                                                                                                                                                                           |
| Fréquence                                               | <input type="radio"/> DIE<br><input type="radio"/> BID<br><input type="radio"/> TID<br><input type="radio"/> QID<br><input type="radio"/> Donnée manquante                                                                                                                                                                                                                                                                                                                                                                           |
| Nombre de jours de traitement prescrit_modification atb | _____ (Noter en jours)                                                                                                                                                                                                                                                                                                                                                                                                                                                                                                               |
| Date début de l'antibiotique                            | _____ (01-01-1901 si inconnue)                                                                                                                                                                                                                                                                                                                                                                                                                                                                                                       |
| Date fin de l'antibiotique                              | _____ (01-01-1901 si inconnue)                                                                                                                                                                                                                                                                                                                                                                                                                                                                                                       |
| <b>MODIFICATION # 2</b>                                 |                                                                                                                                                                                                                                                                                                                                                                                                                                                                                                                                      |
| Raison de la modification # 2                           | <input type="radio"/> Échec au traitement<br><input type="radio"/> Traitement initial non optimal<br><input type="radio"/> Modification de la voie d'administration<br><input type="radio"/> Modification de la durée du traitement<br><input type="radio"/> Réaction allergique<br><input type="radio"/> Non précisé                                                                                                                                                                                                                |
| Nom                                                     | <input type="radio"/> Doxycycline<br><input type="radio"/> Amoxicilline<br><input type="radio"/> Céfuroxime<br><input type="radio"/> Ceftriaxone<br><input type="radio"/> Penicilline G<br><input type="radio"/> Clarithromycin<br><input type="radio"/> Cephalexine<br><input type="radio"/> Clavulin<br><input type="radio"/> Clindamycine<br><input type="radio"/> Azithromycine<br><input type="radio"/> Tazobactam<br><input type="radio"/> Vancomycine<br><input type="radio"/> Céfazoline<br><input type="radio"/> Céfadroxil |
| Dose                                                    | _____ (999 si donnée manquante)                                                                                                                                                                                                                                                                                                                                                                                                                                                                                                      |

Confidential

Page 22 of 216

|                                                         |                                                                                                                                                                                                                                                                                                                                                                                                                                                                                                                                      |
|---------------------------------------------------------|--------------------------------------------------------------------------------------------------------------------------------------------------------------------------------------------------------------------------------------------------------------------------------------------------------------------------------------------------------------------------------------------------------------------------------------------------------------------------------------------------------------------------------------|
| Unité                                                   | <input type="radio"/> mg<br><input type="radio"/> g<br><input type="radio"/> UI<br><input type="radio"/> Donnée manquante                                                                                                                                                                                                                                                                                                                                                                                                            |
| Voie                                                    | <input type="radio"/> PO<br><input type="radio"/> IV<br><input type="radio"/> IM<br><input type="radio"/> Donnée manquante                                                                                                                                                                                                                                                                                                                                                                                                           |
| Fréquence                                               | <input type="radio"/> DIE<br><input type="radio"/> BID<br><input type="radio"/> TID<br><input type="radio"/> QID<br><input type="radio"/> Donnée manquante                                                                                                                                                                                                                                                                                                                                                                           |
| Nombre de jours de traitement prescrit_modification atb | _____ (Noter en jours)                                                                                                                                                                                                                                                                                                                                                                                                                                                                                                               |
| Date début de l'antibiotique                            | _____ (01-01-1901 si inconnue)                                                                                                                                                                                                                                                                                                                                                                                                                                                                                                       |
| Date fin de l'antibiotique                              | _____ (01-01-1901 si inconnue)                                                                                                                                                                                                                                                                                                                                                                                                                                                                                                       |
| <b>MODIFICATION # 3</b>                                 |                                                                                                                                                                                                                                                                                                                                                                                                                                                                                                                                      |
| Raison de la modification # 3                           | <input type="radio"/> Échec au traitement<br><input type="radio"/> Traitement initial non optimal<br><input type="radio"/> Modification de la voie d'administration<br><input type="radio"/> Modification de la durée du traitement<br><input type="radio"/> Réaction allergique<br><input type="radio"/> Non précisé                                                                                                                                                                                                                |
| Nom                                                     | <input type="radio"/> Doxycycline<br><input type="radio"/> Amoxicilline<br><input type="radio"/> Céfuroxime<br><input type="radio"/> Ceftriaxone<br><input type="radio"/> Penicilline G<br><input type="radio"/> Clarithromycin<br><input type="radio"/> Cephalexine<br><input type="radio"/> Clavulin<br><input type="radio"/> Clindamycine<br><input type="radio"/> Azithromycine<br><input type="radio"/> Tazobactam<br><input type="radio"/> Vancomycine<br><input type="radio"/> Céfazoline<br><input type="radio"/> Céfadroxil |
| Dose                                                    | _____ (999 si donnée manquante)                                                                                                                                                                                                                                                                                                                                                                                                                                                                                                      |

Confidential

Page 23 of 216

|                                                                    |                                                                                                                                                            |
|--------------------------------------------------------------------|------------------------------------------------------------------------------------------------------------------------------------------------------------|
| Unité                                                              | <input type="radio"/> mg<br><input type="radio"/> g<br><input type="radio"/> UI<br><input type="radio"/> Donnée manquante                                  |
| Voie                                                               | <input type="radio"/> PO<br><input type="radio"/> IV<br><input type="radio"/> IM<br><input type="radio"/> Donnée manquante                                 |
| Fréquence                                                          | <input type="radio"/> DIE<br><input type="radio"/> BID<br><input type="radio"/> TID<br><input type="radio"/> QID<br><input type="radio"/> Donnée manquante |
| Nombre de jours de traitement prescrit_modification atb            | _____ (Noter en jours)                                                                                                                                     |
| Date début de l'antibiotique                                       | _____ (01-01-1901 si inconnue)                                                                                                                             |
| Date fin de l'antibiotique                                         | _____ (01-01-1901 si inconnue)                                                                                                                             |
| <b>DATE DE RÉOLUTION DE LA MALADIE DE LYME</b>                     |                                                                                                                                                            |
| Date de résolution                                                 | _____ (01-01-1901 si inconnue)                                                                                                                             |
| <b>DÉCÈS</b>                                                       |                                                                                                                                                            |
| Est-ce que le patient est décédé au moment de la revue du dossier? | <input type="radio"/> Non<br><input type="radio"/> Oui                                                                                                     |
| Date du décès                                                      | _____ (01-01-1901 si inconnue)                                                                                                                             |
| Est-ce que le décès est relié à l'épisode de maladie de Lyme?      | <input type="radio"/> Non<br><input type="radio"/> Oui                                                                                                     |

**ÉVALUATION DE L'ISSUE CLINIQUE**

- 1. Évolution favorable : disparition des signes et/ ou symptômes dans les 3 mois suivant le début du premier antibiotique prescrit**
- 2. Échec au traitement : absence de résolution des symptômes avec au moins un signe clinique objectivable malgré le traitement, avec consultation subséquente ou référence en spécialité > 3 mois suivant le début du premier antibiotique prescrit**
- 3. Syndrome post maladie de Lyme : persistance des symptômes subjectifs tels que fatigue, malaise, légère douleur musculaire ou articulaire ou insomnie, et ce, > 3 mois suivant le début du premier antibiotique prescrit, en absence de signe clinique objectivable**



|                |                                                                                                                                                                                     |
|----------------|-------------------------------------------------------------------------------------------------------------------------------------------------------------------------------------|
| Issue clinique | <input type="radio"/> Évolution favorable<br><input type="radio"/> Échec au traitement<br><input type="radio"/> Syndrome post Lyme<br><input type="radio"/> Impossible à déterminer |
|----------------|-------------------------------------------------------------------------------------------------------------------------------------------------------------------------------------|

### SECTION À COMPLÉTER PAR LES CHERCHEURS

|                                      |                                                                                                                                                         |
|--------------------------------------|---------------------------------------------------------------------------------------------------------------------------------------------------------|
| Classification de la maladie de Lyme | <input type="radio"/> Maladie précoce localisée<br><input type="radio"/> Maladie disséminée précoce<br><input type="radio"/> Maladie disséminée tardive |
|--------------------------------------|---------------------------------------------------------------------------------------------------------------------------------------------------------|

|                                      |                                                                                                                                                                                                                                                                                                                                                                         |
|--------------------------------------|-------------------------------------------------------------------------------------------------------------------------------------------------------------------------------------------------------------------------------------------------------------------------------------------------------------------------------------------------------------------------|
| Spécifier maladie disséminée précoce | <input type="checkbox"/> EMM<br><input type="checkbox"/> Paralysie faciale<br><input type="checkbox"/> BAV 1e degré<br><input type="checkbox"/> Méningite<br><input type="checkbox"/> BAV 2e degré<br><input type="checkbox"/> BAV 3e degré<br><input type="checkbox"/> Cardite<br><input type="checkbox"/> Non différenciée<br><input type="checkbox"/> Radiculopathie |
|--------------------------------------|-------------------------------------------------------------------------------------------------------------------------------------------------------------------------------------------------------------------------------------------------------------------------------------------------------------------------------------------------------------------------|

|                                      |                                                                                                                    |
|--------------------------------------|--------------------------------------------------------------------------------------------------------------------|
| Spécifier maladie disséminée tardive | <input type="checkbox"/> Arthrite<br><input type="checkbox"/> Arthrite récurrente<br><input type="checkbox"/> ADCA |
|--------------------------------------|--------------------------------------------------------------------------------------------------------------------|

### CONFORMITÉ AU TRAITEMENT

|                                            |                                                        |
|--------------------------------------------|--------------------------------------------------------|
| Information sur le traitement disponible ? | <input type="radio"/> Non<br><input type="radio"/> Oui |
|--------------------------------------------|--------------------------------------------------------|

|                                        |                                                                                                                                                                                                                                                           |
|----------------------------------------|-----------------------------------------------------------------------------------------------------------------------------------------------------------------------------------------------------------------------------------------------------------|
| Conformité au traitement selon le IDSA | <input type="radio"/> Non<br><input type="radio"/> Oui<br><input type="radio"/> Organisme ne statue pas sur cette condition<br><input type="radio"/> Impossible à déterminer<br><input type="radio"/> Traitement conforme, mais non-observance du patient |
|----------------------------------------|-----------------------------------------------------------------------------------------------------------------------------------------------------------------------------------------------------------------------------------------------------------|

|                                                              |                                                                                                                                                                                                                                                                                                         |
|--------------------------------------------------------------|---------------------------------------------------------------------------------------------------------------------------------------------------------------------------------------------------------------------------------------------------------------------------------------------------------|
| Si traitement non conforme, préciser le critère non respecté | <input type="checkbox"/> Molécule inadéquate<br><input type="checkbox"/> Dose supérieure au traitement standard<br><input type="checkbox"/> Dose inférieure au traitement standard<br><input type="checkbox"/> Durée de traitement trop long<br><input type="checkbox"/> Durée de traitement trop court |
|--------------------------------------------------------------|---------------------------------------------------------------------------------------------------------------------------------------------------------------------------------------------------------------------------------------------------------------------------------------------------------|

|                                       |                                                                                                                                                                                                                                                           |
|---------------------------------------|-----------------------------------------------------------------------------------------------------------------------------------------------------------------------------------------------------------------------------------------------------------|
| Conformité au traitement selon le HAS | <input type="radio"/> Non<br><input type="radio"/> Oui<br><input type="radio"/> Organisme ne statue pas sur cette condition<br><input type="radio"/> Impossible à déterminer<br><input type="radio"/> Traitement conforme, mais non-observance du patient |
|---------------------------------------|-----------------------------------------------------------------------------------------------------------------------------------------------------------------------------------------------------------------------------------------------------------|

|                                                              |                                                                                                                                                                                                                                                                                                         |
|--------------------------------------------------------------|---------------------------------------------------------------------------------------------------------------------------------------------------------------------------------------------------------------------------------------------------------------------------------------------------------|
| Si traitement non conforme, préciser le critère non respecté | <input type="checkbox"/> Molécule inadéquate<br><input type="checkbox"/> Dose supérieure au traitement standard<br><input type="checkbox"/> Dose inférieure au traitement standard<br><input type="checkbox"/> Durée de traitement trop long<br><input type="checkbox"/> Durée de traitement trop court |
|--------------------------------------------------------------|---------------------------------------------------------------------------------------------------------------------------------------------------------------------------------------------------------------------------------------------------------------------------------------------------------|

---

Conformité au traitement selon le UK

Non  
 Oui  
 Organisme ne statue pas sur cette condition  
 Impossible à déterminer  
 Traitement conforme, mais non-observance du patient

---

Si traitement non conforme, préciser le critère non respecté

Molécule inadéquate  
 Dose supérieure au traitement standard  
 Dose inférieure au traitement standard  
 Durée de traitement trop long  
 Durée de traitement trop court

---

Conformité au traitement selon l'INESSS

Non  
 Oui  
 Organisme ne statue pas sur cette condition  
 Impossible à déterminer  
 Traitement conforme, mais non-observance du patient

---

Si traitement non conforme, préciser le critère non respecté

Molécule inadéquate  
 Dose supérieure au traitement standard  
 Dose inférieure au traitement standard  
 Durée de traitement trop long  
 Durée de traitement trop court

---

#### **ISSUE CLINIQUE ÉVALUÉE PAR LE CHERCHEUR**

Issue clinique évaluée par le chercheur

Évolution favorable  
 Échec au traitement  
 Impossible à déterminer

---

Syndrome post Lyme ?

Non  
 Oui  
 Impossible à déterminer

## Épreuves diagnostiques initiales

### LABORATOIRES

Analyses réalisées

- EIA (ELISA)  
 EIA (ELISA) non différencié  
 WB (Western blot)  
 PCR  
 (Cocher toutes les réponses applicables)

Date du prélèvement pour le test EIA

  
 (01-01-1901 si inconnue)

Date du résultat préliminaire (EIA)

  
 (01-01-1901 si inconnue)

Résultat EIA (IgM)

- IgM négatif  
 IgM positif  
 Douteux/Indéterminé/Non concluant  
 Non effectué

Résultat EIA (IgG)

- IgG Négatif  
 IgG Positif  
 Douteux/Indéterminé/Non concluant  
 Non effectué

Date du prélèvement pour le test EIA non différencié

  
 (01-01-1901 si inconnue)

Date du résultat préliminaire (EIA non différencié)

  
 (01-01-1901 si inconnue)

Résultat du EIA non différencié

- Négatif  
 Positif  
 Douteux/Indéterminé/Non concluant

Date du rapport final du WB (ou, si non retrouvée, date 3e colonne liste LSPQ)

  
 (01-01-1901 si inconnue)

Résultat WB (IgG)

- IgG négatif  
 IgG positif  
 Douteux/Indéterminé/Non concluant

Résultat WB (IgM)

- IgM négatif  
 IgM positif  
 Douteux/Indéterminé/Non concluant  
 Non effectué

Date du prélèvement du PCR

  
 (01-01-1901 si inconnue)

Confidential

Page 27 of 216

Date du rapport final (PCR)

---

  
(01-01-1901 si inconnue)

Résultat du PCR

- Négatif  
 Positif  
 Douteux/Indéterminé/Non concluant

**INFECTIONS CONCOMITANTES**

Infections concomitantes testées ?

- Non  
 Oui

Spécifier infections concomitantes testées

- Anaplasmose  
 Ehrlichiose  
 Babésiose  
 Tularémie  
 Rocky Mountain spotted fever (RMSF)  
 (Cocher toutes les réponses applicables)

**ANAPLASMOSE**

Analyses réalisées pour "anaplasmose"

- Sérologie  
 PCR

Nombre de sérologies pour anaplasmose

---

Date de la sérologie "anaplasmose" # 1

---

  
(01-01-1901 si inconnue)

Nombre de dilution

---

  
(999 si donnée manquante)

Résultat de la sérologie "anaplasmose" # 1

- Négatif  
 Positif  
 Douteux/Indéterminé/Non concluant

Date de la sérologie "anaplasmose" # 2

---

  
(01-01-1901 si inconnue)

Nombre de dilution

---

  
(999 si donnée manquante)

Résultat de la sérologie "anaplasmose" # 2

- Négatif  
 Positif  
 Douteux/Indéterminé/Non concluant

Date de la sérologie "anaplasmose" # 3

---

  
(01-01-1901 si inconnue)

Confidential

Page 28 of 216

---

 Nombre de dilution

---

 (999 si donnée manquante)

---

 Résultat de la sérologie "anaplasme" # 3

- Négatif  
 Positif  
 Douteux/Indéterminé/Non concluant

---

 Date du PCR pour "anaplasme"

---

 (01-01-1901 si inconnue)

---

 Résultat du PCR "anaplasme"

- Négatif  
 Positif  
 Douteux/Indéterminé/Non concluant

---

**EHRlichiose**


---

Analyses réalisées pour "ehrlichiose"

- Sérologie  
 PCR

---

 Nombre de sérologies pour ehrlichiose

---



---

 Date de la sérologie "ehrlichiose" # 1

---

 (01-01-1901 si inconnue)

---

 Nombre de dilution

---

 (999 si donnée manquante)

---

 Résultat de la sérologie "ehrlichiose" # 1

- Négatif  
 Positif  
 Douteux/Indéterminé/Non concluant

---

 Date de la sérologie "ehrlichiose" # 2

---

 (01-01-1901 si inconnue)

---

 Nombre de dilution

---

 (999 si donnée manquante)

---

 Résultat de la sérologie "ehrlichiose" # 2

- Négatif  
 Positif  
 Douteux/Indéterminé/Non concluant

---

 Date de la sérologie "ehrlichiose" # 3

---

 (01-01-1901 si inconnue)

---

 Nombre de dilution

---

 (999 si donnée manquante)

Confidential

Page 29 of 216

Résultat de la sérologie "ehrlichiose" # 3

- Négatif  
 Positif  
 Douteux/Indéterminé/Non concluant

Date du PCR pour "ehrlichiose"

\_\_\_\_\_

(01-01-1901 si inconnue)

Résultat du PCR pour "ehrlichiose"

- Négatif  
 Positif  
 Douteux/Indéterminé/Non concluant

**BABÉSIOSE**

Analyses réalisées pour "babésiose"

- Sérologie  
 PCR  
 Frottis sanguin

Nombre de sérologies pour babésiose

\_\_\_\_\_

Date de la sérologie "babésiose" # 1

\_\_\_\_\_

(01-01-1901 si inconnue)

Nombre de dilution

\_\_\_\_\_

(999 si donnée manquante)

Résultat de la sérologie "babésiose" # 1

- Négatif  
 Positif  
 Douteux/Indéterminé/Non concluant

Date de la sérologie "babésiose" # 2

\_\_\_\_\_

(01-01-1901 si inconnue)

Nombre de dilution

\_\_\_\_\_

(999 si donnée manquante)

Résultat de la sérologie "babésiose" # 2

- Négatif  
 Positif  
 Douteux/Indéterminé/Non concluant

Date de la sérologie "babésiose" # 3

\_\_\_\_\_

(01-01-1901 si inconnue)

Nombre de dilution

\_\_\_\_\_

(999 si donnée manquante)

Résultat de la sérologie "babésiose" # 3

- Négatif  
 Positif  
 Douteux/Indéterminé/Non concluant

Confidential

Page 30 of 216

Date du PCR pour "Babésiose"

---

  
(01-01-1901 si inconnue)

Résultat du PCR pour "babésiose"

- Négatif  
 Positif  
 Douteux/Indéterminé/Non concluant

Date du frottis sanguins pour "babésiose"

---

  
(01-01-1901 si inconnue)

Résultat du frottis sanguin pour "babésiose"

- Normal  
 Anormal  
 Donnée manquante

**TULARÉMIE**

Analyses réalisées pour "tularémie"

- Sérologie  
 PCR

Nombre de sérologie pour "tularémie"

---

Date de la sérologie pour "tularémie" # 1

---

  
(01-01-1901 si inconnue)

Nombre de dilution

---

  
(999 si donnée manquante)

Résultat de la sérologie pour "tularémie" # 1

- Négatif  
 Positif  
 Douteux/Indéterminé/Non concluant

Date de la sérologie pour "tularémie" # 2

---

  
(01-01-1901 si inconnue)

Nombre de dilution

---

  
(999 si donnée manquante)

Résultat de la sérologie pour "tularémie" # 2

- Négatif  
 Positif  
 Douteux/Indéterminé/Non concluant

Date de la sérologie pour "tularémie" # 3

---

  
(01-01-1901 si inconnue)

Nombre de dilution

---

  
(999 si donnée manquante)

Confidential

Page 31 of 216

Résultat de la sérologie pour "tularémie" # 3

- Négatif  
 Positif  
 Douteux/Indéterminé/Non concluant

Date du PCR pour "tularémie"

\_\_\_\_\_

(01-01-1901 si inconnue)

Résultat du PCR pour "tularémie"

- Négatif  
 Positif  
 Douteux/Indéterminé/Non concluant

**ROCKY MOUNTAIN SPOTTED FEVER (RMSF)**

Analyses réalisées pour "RMSF"

- Sérologie  
 PCR

Nombre de sérologies pour "RMSF"

\_\_\_\_\_

Date de la sérologie pour "RMSF" # 1

\_\_\_\_\_

(01-01-1901 si inconnue)

Nombre de dilution

\_\_\_\_\_

(999 si donnée manquante)

Résultat de la sérologie pour "RMSF" # 1

- Négatif  
 Positif  
 Douteux/Indéterminé/Non concluant  
 (999 si donnée manquante)

Date de la sérologie pour "RMSF" # 2

\_\_\_\_\_

(01-01-1901 si inconnue)

Nombre de dilution

\_\_\_\_\_

(999 si donnée manquante)

Résultat de la sérologie pour "RMSF" # 2

- Négatif  
 Positif  
 Douteux/Indéterminé/Non concluant  
 (999 si donnée manquante)

Date de la sérologie pour "RMSF" # 3

\_\_\_\_\_

(01-01-1901 si inconnue)

Nombre de dilution

\_\_\_\_\_

(999 si donnée manquante)



*Confidential*

Page 32 of 216

---

Résultat de la sérologie pour "RMSF" # 3

- Négatif  
 Positif  
 Douteux/Indéterminé/Non concluant  
(999 si donnée manquante)

---

Date du PCR pour "RMSF"

---

(01-01-1901 si inconnue)

---

Résultat du PCR pour "RMSF"

- Négatif  
 Positif  
 Douteux/Indéterminé/Non concluant
